# Supplementary material for: Silencing the HaHR3 Gene by Transgenic Plant-mediated RNAi to Disrupt Helicoverpa armigera Development
Source: PubMed Central journal article supplement — Int J Biol Sci. 2013 Apr 23;9(4):370–81. doi: 10.7150/ijbs.5929 (PMC3638292; doi:10.7150/ijbs.5929), 2013-04-23
Supplement: ijbsv09p0370s1.pdf [file ijbsv09p0370s1.pdf]

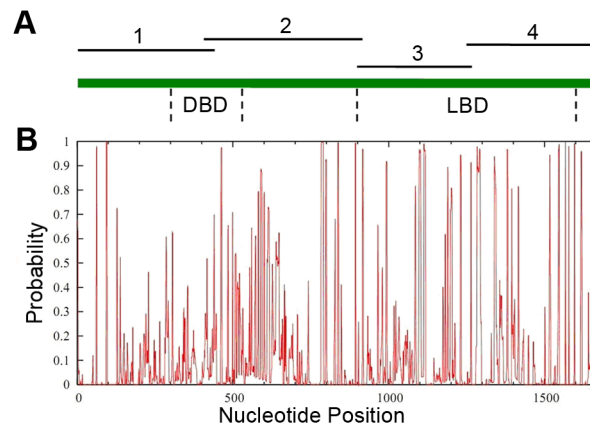

**Figure S1. Bioinformatics analysis of *HaHR3*.** (A) Graphic representation of fragment selection and domain locations. Numbers 1, 2, 3 and 4 mean fragment 1, fragment 2, fragment 3 and fragment 4, respectively, for subsequent bacterial expression of the dsRNAs. The bold green line means the full CDS of *HaHR3*. The length and site of the four black lines represent the corresponding fragment length and site in the CDS. DBD and LBD mean DNA-binding domain and ligand-binding domain, respectively. (B) Probability profile of the *HaHR3* mRNA. High-probability sites are predicted to be accessible.

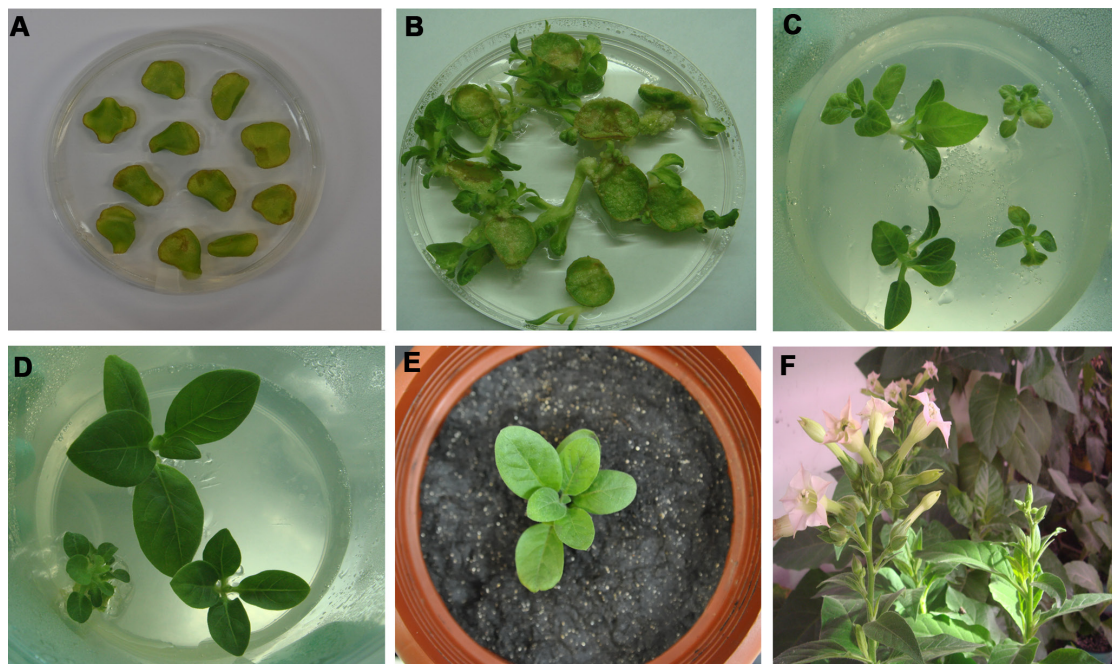

**Figure S2. Generation of transgenic tobacco plant lines with standard tissue culture procedures.** (A) Inoculation of leaf disks with *A. tumefaciens*. (B) Culture of transformed tissue with selection medium. (C) Shoot regeneration of transgenic plants. (D) Rooting and growth of transgenic plants on rooting medium. (E) Transplantation of rooted plantlets to sterilized soil, one plantlet per pot. (F) Growth in greenhouse and harvesting of the seeds.

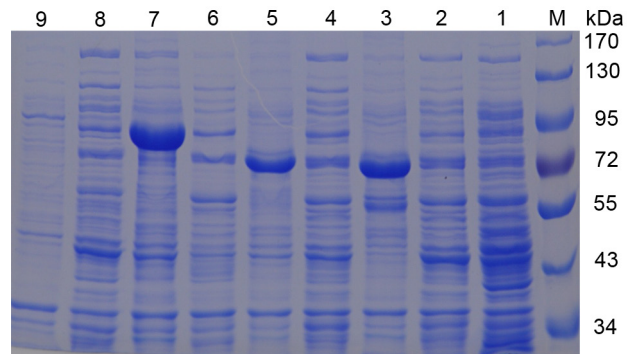

**Figure S3. *HaHR3* protein expression with different vectors in *E. coli* cells.** M: Marker; 1: No IPTG adding in bacterial solution; 2: pET-28a-*HaHR3* supernatant of sonication; 3: pET-28a-*HaHR3* pellet and inclusion body; 4: pET-30a-*HaHR3* supernatant of sonication; 5: pET-30a-*HaHR3* pellet and inclusion body; 6: pET-32a-*HaHR3* supernatant of sonication; 7: pET-32a-*HaHR3* pellet and inclusion body; 8: pGEX-6p-1-*HaHR3* supernatant of sonication; 9: pGEX-6p-1-*HaHR3* pellet and inclusion body
